# Supplementary material for: Establishment of porcine enterocyte/myofibroblast co-cultures for the growth of porcine rota- and coronaviruses
Source: PubMed Central journal article supplement (PMC6185943; doi:10.1038/s41598-018-33305-1), 2018-10-12
Supplement: 41598_2018_33305_MOESM1_ESM.pdf [file 41598_2018_33305_MOESM1_ESM.pdf]

## Establishment of porcine enterocyte/myofibroblast co-cultures for the growth of porcine rota- and coronaviruses

Tingting Cui<sup>1\*</sup>, Sebastiaan Theuns<sup>1</sup>, Lowiese M.B. Desmaretz<sup>1</sup>, Jiexiong Xie<sup>1</sup>, Gaëtan M.A. De Gryse<sup>1</sup>, Bo Yang<sup>1</sup>, Wim Van den Broeck<sup>2</sup>, Hans J. Nauwynck<sup>1\*</sup>

### Supplementary documents

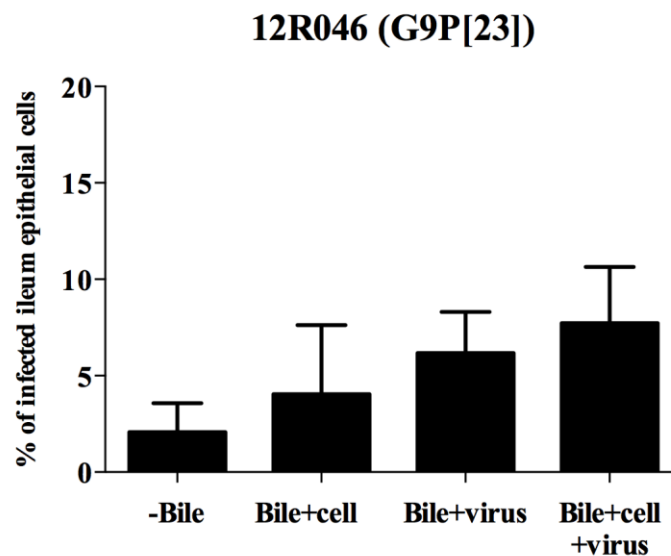

Figure S1. **Effect of bile treatment of rotavirus 12R046 strain on the replication in primary ileum epithelial cells.** Bile collected from the gallbladder of 12 weeks old pig was used to treat cells and virus separately and simultaneously. Percentage of infection was evaluated 24 h p.i. Data are expressed as means  $\pm$  standard deviation of the results of 3 separate experiment.

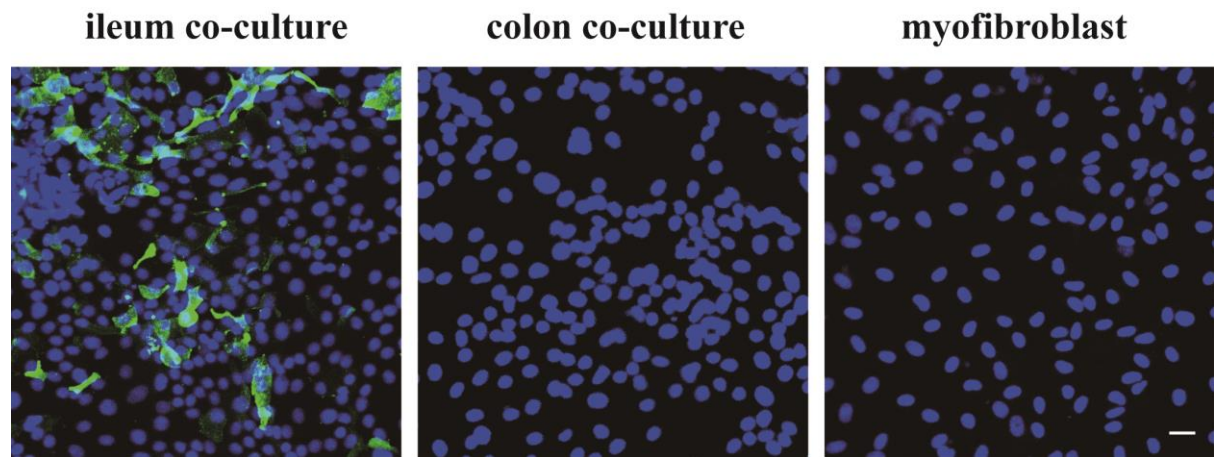

Figure S2. **Porcine aminopeptidase N (pAPN) expression of primary enterocytes and ileum myofibroblasts.** Three days post seeding, co-cultured enterocytes and myofibroblasts were stained with mouse monoclonal anti-porcine aminopeptidase N antibodies (green). Scale bar: 25  $\mu\text{m}$ .
